# Supplementary material for: Integrative model of coronary flow in anatomically based vasculature under myogenic, shear, and metabolic regulation
Source: PubMed Central journal article supplement — J Gen Physiol. 2018 Jan 2;150(1):145–68. doi: 10.1085/jgp.201711795 (PMC5749109; doi:10.1085/jgp.201711795), 2018-01-02
Supplement: JGP_201711795_sm.pdf [file JGP_201711795_sm.pdf]

## SUPPLEMENTAL MATERIAL

Namani et al., <https://doi.org/10.1085/jgp.2017111795>

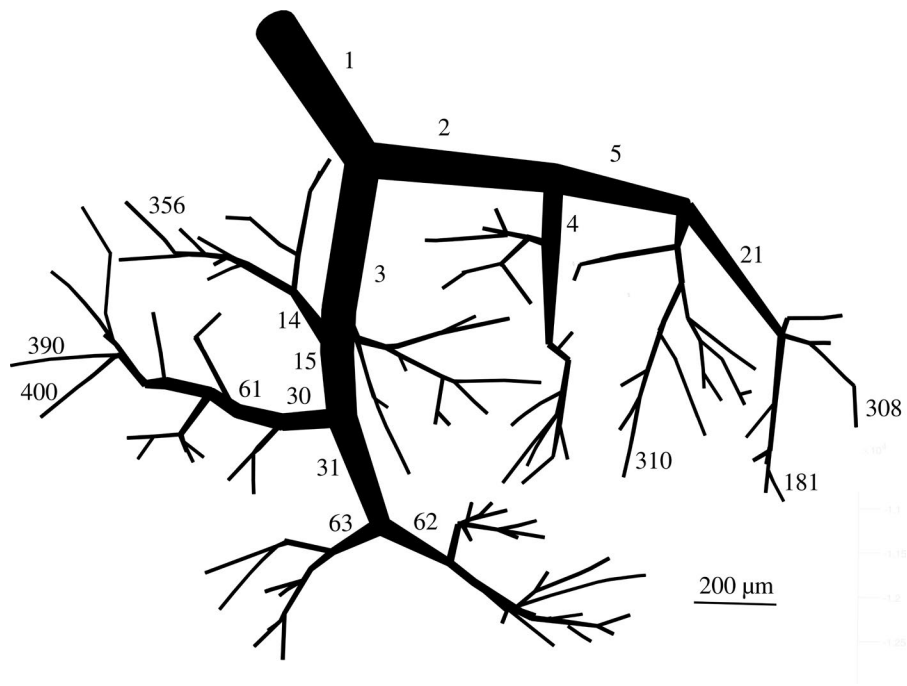

Figure S1. **Tree structure.** Structure of the stochastically reconstructed subtree (Kaimovitz et al., 2005) following morphometric data (Kassab et al., 1993). A total of 281 out of 400 vessels are plotted to improve clarity.

Table S1, included in a separate PDF, shows vessel dimensions and network connectivity of the 400-vessel subtree.

## REFERENCES

- Kaimovitz, B., Y. Lanir, and G.S. Kassab. 2005. Large-scale 3-D geometric reconstruction of the porcine coronary arterial vasculature based on detailed anatomical data. *Ann. Biomed. Eng.* 33:1517–1535. <https://doi.org/10.1007/s10439-005-7544-3>
- Kassab, G.S., C.A. Rider, N.J. Tang, and Y.C. Fung. 1993. Morphometry of pig coronary arterial trees. *Am. J. Physiol.* 265:H350–H365.
