# Supplementary material for: Integrative model of coronary flow in anatomically based vasculature under myogenic, shear, and metabolic regulation
Source: PubMed Central journal article supplement — J Gen Physiol. 2018 Jan 2;150(1):145–68. doi: 10.1085/jgp.201711795 (PMC5749109; doi:10.1085/jgp.201711795), 2018-01-02
Supplement: JGP_201711795_TableS1.pdf [file JGP_201711795_TableS1.pdf]

Table S1. Vessel dimensions and network connectivity of the 400-vessel subtree

| Vessel no. | Length  | Diameter | Vessel order | Daughter 1 Vessel no. | Daughter 2 Vessel no. | Daughter 3 Vessel no. |
|------------|---------|----------|--------------|-----------------------|-----------------------|-----------------------|
|            | $\mu m$ | $\mu m$  |              |                       |                       |                       |
| 1          | 522.9   | 104.8    | 6            | 2                     | 3                     | 0                     |
| 2          | 560.2   | 98.3     | 5            | 4                     | 5                     | 0                     |
| 3          | 445.6   | 97.6     | 5            | 6                     | 7                     | 0                     |
| 4          | 172.2   | 52.0     | 4            | 8                     | 9                     | 0                     |
| 5          | 395.7   | 97.8     | 5            | 10                    | 11                    | 0                     |
| 6          | 89.8    | 52.0     | 4            | 12                    | 13                    | 0                     |
| 7          | 129.2   | 95.5     | 5            | 14                    | 15                    | 0                     |
| 8          | 124.8   | 21.7     | 3            | 16                    | 17                    | 0                     |
| 9          | 257.4   | 52.0     | 4            | 18                    | 19                    | 0                     |
| 10         | 412.2   | 52.0     | 4            | 20                    | 21                    | 0                     |
| 11         | 104.2   | 52.0     | 4            | 22                    | 23                    | 0                     |
| 12         | 47.9    | 15.4     | 2            | 24                    | 25                    | 0                     |
| 13         | 80.0    | 22.7     | 3            | 26                    | 27                    | 0                     |
| 14         | 196.5   | 52.0     | 4            | 28                    | 29                    | 0                     |
| 15         | 205.9   | 94.9     | 5            | 30                    | 31                    | 0                     |
| 16         | 154.5   | 15.4     | 2            | 32                    | 33                    | 0                     |
| 17         | 122.0   | 15.4     | 2            | 34                    | 35                    | 0                     |
| 18         | 25.7    | 14.4     | 2            | 36                    | 37                    | 0                     |
| 19         | 45.7    | 22.7     | 3            | 38                    | 39                    | 0                     |
| 20         | 175.4   | 22.7     | 3            | 40                    | 41                    | 0                     |
| 21         | 16.3    | 15.4     | 2            | 42                    | 43                    | 0                     |
| 22         | 161.8   | 15.4     | 2            | 44                    | 45                    | 0                     |
| 23         | 95.1    | 22.7     | 3            | 46                    | 47                    | 0                     |
| 24         | 92.3    | 10.7     | 1            | 48                    | 49                    | 0                     |
| 25         | 55.8    | 10.7     | 1            | 50                    | 51                    | 0                     |
| 26         | 32.2    | 15.4     | 2            | 52                    | 53                    | 0                     |
| 27         | 40.5    | 15.4     | 2            | 54                    | 55                    | 0                     |
| 28         | 145.1   | 22.7     | 3            | 56                    | 57                    | 0                     |
| 29         | 96.7    | 15.4     | 2            | 58                    | 59                    | 0                     |
| 30         | 160.3   | 52.0     | 4            | 60                    | 61                    | 0                     |
| 31         | 1249.3  | 95.8     | 5            | 62                    | 63                    | 0                     |
| 32         | 24.7    | 10.7     | 1            | 64                    | 65                    | 0                     |
| 33         | 30.0    | 6.4      | 1            | 0                     | 0                     | 0                     |

|    |       |      |   |     |     |   |
|----|-------|------|---|-----|-----|---|
| 34 | 253.7 | 5.6  | 0 | 0   | 0   | 0 |
| 35 | 29.4  | 10.7 | 1 | 66  | 67  | 0 |
| 36 | 67.2  | 7.0  | 1 | 0   | 0   | 0 |
| 37 | 348.2 | 4.3  | 0 | 0   | 0   | 0 |
| 38 | 166.4 | 15.4 | 2 | 68  | 69  | 0 |
| 39 | 83.4  | 15.4 | 2 | 70  | 71  | 0 |
| 40 | 126.0 | 15.4 | 2 | 72  | 73  | 0 |
| 41 | 117.5 | 9.7  | 1 | 74  | 75  | 0 |
| 42 | 93.9  | 10.7 | 1 | 76  | 77  | 0 |
| 43 | 59.2  | 14.4 | 2 | 78  | 79  | 0 |
| 44 | 44.6  | 10.7 | 1 | 80  | 81  | 0 |
| 45 | 100.2 | 15.4 | 2 | 82  | 83  | 0 |
| 46 | 112.0 | 15.4 | 2 | 84  | 85  | 0 |
| 47 | 98.5  | 22.7 | 3 | 86  | 87  | 0 |
| 48 | 190.0 | 5.8  | 0 | 0   | 0   | 0 |
| 49 | 18.6  | 10.7 | 1 | 88  | 89  | 0 |
| 50 | 376.1 | 5.4  | 0 | 0   | 0   | 0 |
| 51 | 82.6  | 10.7 | 1 | 90  | 91  | 0 |
| 52 | 122.8 | 6.4  | 0 | 0   | 0   | 0 |
| 53 | 118.4 | 15.4 | 2 | 92  | 93  | 0 |
| 54 | 8.7   | 10.7 | 1 | 94  | 95  | 0 |
| 55 | 126.3 | 15.4 | 2 | 96  | 97  | 0 |
| 56 | 50.3  | 14.4 | 2 | 98  | 99  | 0 |
| 57 | 51.0  | 22.7 | 3 | 100 | 101 | 0 |
| 58 | 55.3  | 10.7 | 1 | 102 | 103 | 0 |
| 59 | 167.6 | 15.4 | 2 | 104 | 105 | 0 |
| 60 | 92.2  | 14.4 | 2 | 106 | 107 | 0 |
| 61 | 123.8 | 52.0 | 4 | 108 | 109 | 0 |
| 62 | 399.1 | 52.0 | 4 | 110 | 111 | 0 |
| 63 | 147.4 | 52.0 | 4 | 112 | 113 | 0 |
| 64 | 244.6 | 3.8  | 0 | 0   | 0   | 0 |
| 65 | 25.2  | 6.4  | 1 | 0   | 0   | 0 |
| 66 | 228.1 | 7.1  | 0 | 0   | 0   | 0 |
| 67 | 87.6  | 10.7 | 1 | 114 | 115 | 0 |
| 68 | 95.6  | 9.1  | 1 | 0   | 0   | 0 |
| 69 | 88.7  | 14.4 | 2 | 116 | 117 | 0 |
| 70 | 67.5  | 10.7 | 1 | 118 | 119 | 0 |
| 71 | 62.4  | 15.4 | 2 | 120 | 121 | 0 |

|     |       |      |   |     |     |   |
|-----|-------|------|---|-----|-----|---|
| 72  | 109.5 | 9.5  | 1 | 0   | 0   | 0 |
| 73  | 50.7  | 14.4 | 2 | 122 | 123 | 0 |
| 74  | 262.0 | 6.2  | 0 | 0   | 0   | 0 |
| 75  | 42.9  | 9.9  | 1 | 124 | 125 | 0 |
| 76  | 263.7 | 5.9  | 0 | 0   | 0   | 0 |
| 77  | 50.7  | 7.2  | 1 | 0   | 0   | 0 |
| 78  | 25.1  | 10.7 | 1 | 126 | 127 | 0 |
| 79  | 37.7  | 10.3 | 1 | 128 | 129 | 0 |
| 80  | 328.3 | 8.4  | 0 | 0   | 0   | 0 |
| 81  | 72.3  | 10.7 | 1 | 130 | 131 | 0 |
| 82  | 44.0  | 7.9  | 1 | 0   | 0   | 0 |
| 83  | 223.7 | 5.5  | 0 | 0   | 0   | 0 |
| 84  | 141.4 | 10.7 | 1 | 132 | 133 | 0 |
| 85  | 65.9  | 10.7 | 1 | 134 | 135 | 0 |
| 86  | 133.7 | 15.4 | 2 | 136 | 137 | 0 |
| 87  | 27.1  | 14.4 | 2 | 138 | 139 | 0 |
| 88  | 367.1 | 5.9  | 0 | 0   | 0   | 0 |
| 89  | 45.5  | 7.2  | 1 | 0   | 0   | 0 |
| 90  | 346.9 | 6.8  | 0 | 0   | 0   | 0 |
| 91  | 54.8  | 10.7 | 1 | 140 | 141 | 0 |
| 92  | 108.0 | 8.7  | 1 | 0   | 0   | 0 |
| 93  | 188.5 | 15.4 | 2 | 142 | 143 | 0 |
| 94  | 238.0 | 5.7  | 0 | 0   | 0   | 0 |
| 95  | 37.3  | 6.4  | 1 | 0   | 0   | 0 |
| 96  | 5.1   | 10.7 | 1 | 144 | 145 | 0 |
| 97  | 36.0  | 15.4 | 2 | 146 | 147 | 0 |
| 98  | 184.8 | 7.3  | 0 | 0   | 0   | 0 |
| 99  | 100.9 | 9.2  | 1 | 0   | 0   | 0 |
| 100 | 8.6   | 15.4 | 2 | 148 | 149 | 0 |
| 101 | 65.3  | 15.4 | 2 | 150 | 151 | 0 |
| 102 | 126.1 | 5.5  | 0 | 0   | 0   | 0 |
| 103 | 151.3 | 10.7 | 1 | 152 | 153 | 0 |
| 104 | 97.3  | 9.7  | 1 | 0   | 0   | 0 |
| 105 | 36.5  | 10.7 | 1 | 154 | 155 | 0 |
| 106 | 62.7  | 10.7 | 1 | 156 | 157 | 0 |
| 107 | 18.7  | 14.4 | 2 | 158 | 159 | 0 |
| 108 | 39.3  | 22.7 | 3 | 160 | 161 | 0 |
| 109 | 287.8 | 52.0 | 4 | 162 | 163 | 0 |

|     |       |      |   |     |     |   |
|-----|-------|------|---|-----|-----|---|
| 110 | 81.5  | 22.7 | 3 | 164 | 165 | 0 |
| 111 | 23.7  | 21.7 | 3 | 166 | 167 | 0 |
| 112 | 128.8 | 15.4 | 2 | 168 | 169 | 0 |
| 113 | 74.4  | 22.7 | 3 | 170 | 171 | 0 |
| 114 | 188.5 | 6.2  | 0 | 0   | 0   | 0 |
| 115 | 71.8  | 10.7 | 1 | 172 | 173 | 0 |
| 116 | 256.0 | 6.1  | 0 | 0   | 0   | 0 |
| 117 | 107.6 | 10.6 | 1 | 0   | 0   | 0 |
| 118 | 220.9 | 5.6  | 0 | 0   | 0   | 0 |
| 119 | 48.3  | 10.7 | 1 | 174 | 175 | 0 |
| 120 | 30.2  | 10.7 | 1 | 176 | 177 | 0 |
| 121 | 59.8  | 10.7 | 1 | 178 | 179 | 0 |
| 122 | 367.1 | 5.9  | 0 | 0   | 0   | 0 |
| 123 | 35.8  | 10.7 | 1 | 180 | 181 | 0 |
| 124 | 348.3 | 4.9  | 0 | 0   | 0   | 0 |
| 125 | 1.3   | 4.4  | 1 | 0   | 0   | 0 |
| 126 | 224.2 | 5.9  | 0 | 0   | 0   | 0 |
| 127 | 27.1  | 10.7 | 1 | 182 | 183 | 0 |
| 128 | 212.8 | 5.6  | 0 | 0   | 0   | 0 |
| 129 | 18.1  | 6.4  | 1 | 0   | 0   | 0 |
| 130 | 310.1 | 3.8  | 0 | 0   | 0   | 0 |
| 131 | 66.7  | 9.0  | 1 | 0   | 0   | 0 |
| 132 | 218.9 | 4.4  | 0 | 0   | 0   | 0 |
| 133 | 79.0  | 10.3 | 1 | 0   | 0   | 0 |
| 134 | 4.1   | 10.7 | 1 | 184 | 185 | 0 |
| 135 | 74.4  | 10.7 | 1 | 186 | 187 | 0 |
| 136 | 4.6   | 10.7 | 1 | 188 | 189 | 0 |
| 137 | 72.3  | 15.4 | 2 | 190 | 191 | 0 |
| 138 | 117.0 | 10.7 | 1 | 192 | 193 | 0 |
| 139 | 111.2 | 6.7  | 0 | 0   | 0   | 0 |
| 140 | 348.7 | 5.2  | 0 | 0   | 0   | 0 |
| 141 | 78.4  | 10.7 | 1 | 194 | 195 | 0 |
| 142 | 4.5   | 10.7 | 1 | 196 | 197 | 0 |
| 143 | 27.7  | 14.4 | 2 | 198 | 199 | 0 |
| 144 | 143.9 | 4.7  | 0 | 0   | 0   | 0 |
| 145 | 123.8 | 10.7 | 1 | 200 | 201 | 0 |
| 146 | 33.9  | 10.7 | 1 | 202 | 203 | 0 |
| 147 | 73.9  | 10.7 | 1 | 204 | 205 | 0 |

|     |       |      |   |     |     |   |
|-----|-------|------|---|-----|-----|---|
| 148 | 55.9  | 10.7 | 1 | 206 | 207 | 0 |
| 149 | 37.6  | 6.4  | 1 | 0   | 0   | 0 |
| 150 | 3.6   | 10.7 | 1 | 208 | 209 | 0 |
| 151 | 35.5  | 14.4 | 2 | 210 | 211 | 0 |
| 152 | 223.2 | 5.7  | 0 | 0   | 0   | 0 |
| 153 | 14.4  | 7.7  | 1 | 0   | 0   | 0 |
| 154 | 294.5 | 6.5  | 0 | 0   | 0   | 0 |
| 155 | 20.7  | 7.4  | 1 | 0   | 0   | 0 |
| 156 | 301.8 | 5.1  | 0 | 0   | 0   | 0 |
| 157 | 28.6  | 10.7 | 1 | 212 | 213 | 0 |
| 158 | 69.6  | 10.7 | 1 | 214 | 215 | 0 |
| 159 | 251.2 | 3.6  | 0 | 0   | 0   | 0 |
| 160 | 141.3 | 14.5 | 2 | 216 | 217 | 0 |
| 161 | 344.2 | 6.2  | 0 | 0   | 0   | 0 |
| 162 | 80.2  | 22.7 | 3 | 218 | 219 | 0 |
| 163 | 122.0 | 52.0 | 4 | 220 | 221 | 0 |
| 164 | 39.8  | 14.4 | 2 | 222 | 223 | 0 |
| 165 | 121.5 | 22.7 | 3 | 224 | 225 | 0 |
| 166 | 62.5  | 14.8 | 2 | 226 | 227 | 0 |
| 167 | 10.2  | 22.7 | 3 | 228 | 229 | 0 |
| 168 | 69.5  | 10.7 | 1 | 230 | 231 | 0 |
| 169 | 29.6  | 14.4 | 2 | 232 | 233 | 0 |
| 170 | 135.5 | 15.4 | 2 | 234 | 235 | 0 |
| 171 | 37.4  | 14.4 | 2 | 236 | 237 | 0 |
| 172 | 307.1 | 6.6  | 0 | 0   | 0   | 0 |
| 173 | 29.3  | 8.9  | 1 | 0   | 0   | 0 |
| 174 | 273.8 | 6.7  | 0 | 0   | 0   | 0 |
| 175 | 25.2  | 10.7 | 1 | 238 | 239 | 0 |
| 176 | 300.2 | 5.2  | 0 | 0   | 0   | 0 |
| 177 | 71.0  | 10.7 | 1 | 240 | 241 | 0 |
| 178 | 195.5 | 5.2  | 0 | 0   | 0   | 0 |
| 179 | 40.6  | 10.7 | 1 | 242 | 243 | 0 |
| 180 | 246.4 | 7.3  | 0 | 0   | 0   | 0 |
| 181 | 54.8  | 8.7  | 1 | 0   | 0   | 0 |
| 182 | 151.4 | 5.6  | 0 | 0   | 0   | 0 |
| 183 | 77.1  | 10.7 | 1 | 244 | 245 | 0 |
| 184 | 275.7 | 6.9  | 0 | 0   | 0   | 0 |
| 185 | 69.9  | 8.8  | 1 | 0   | 0   | 0 |

|     |       |      |   |     |     |     |
|-----|-------|------|---|-----|-----|-----|
| 186 | 187.3 | 6.9  | 0 | 0   | 0   | 0   |
| 187 | 132.1 | 10.7 | 1 | 246 | 247 | 0   |
| 188 | 208.8 | 5.8  | 0 | 0   | 0   | 0   |
| 189 | 77.4  | 8.2  | 1 | 0   | 0   | 0   |
| 190 | 92.6  | 10.7 | 1 | 248 | 249 | 0   |
| 191 | 49.8  | 10.7 | 1 | 250 | 251 | 0   |
| 192 | 242.0 | 7.6  | 0 | 0   | 0   | 0   |
| 193 | 164.4 | 10.7 | 1 | 252 | 253 | 0   |
| 194 | 299.5 | 8.5  | 0 | 0   | 0   | 0   |
| 195 | 60.6  | 10.7 | 1 | 0   | 0   | 0   |
| 196 | 184.4 | 6.6  | 0 | 0   | 0   | 0   |
| 197 | 123.4 | 10.7 | 1 | 254 | 255 | 0   |
| 198 | 109.9 | 10.7 | 1 | 256 | 257 | 0   |
| 199 | 85.9  | 9.4  | 1 | 0   | 0   | 0   |
| 200 | 322.9 | 7.4  | 0 | 0   | 0   | 0   |
| 201 | 2.3   | 10.7 | 1 | 258 | 259 | 0   |
| 202 | 261.8 | 5.7  | 0 | 0   | 0   | 0   |
| 203 | 102.2 | 10.7 | 1 | 260 | 261 | 0   |
| 204 | 295.3 | 5.8  | 0 | 0   | 0   | 0   |
| 205 | 47.4  | 9.5  | 1 | 0   | 0   | 0   |
| 206 | 234.9 | 6.0  | 0 | 0   | 0   | 0   |
| 207 | 37.0  | 10.7 | 1 | 262 | 263 | 0   |
| 208 | 267.2 | 5.1  | 0 | 0   | 0   | 0   |
| 209 | 41.4  | 10.7 | 1 | 264 | 265 | 0   |
| 210 | 42.6  | 10.7 | 1 | 266 | 267 | 0   |
| 211 | 47.7  | 15.4 | 2 | 268 | 269 | 0   |
| 212 | 299.1 | 6.4  | 0 | 0   | 0   | 0   |
| 213 | 23.4  | 6.4  | 1 | 0   | 0   | 0   |
| 214 | 297.3 | 5.6  | 0 | 0   | 0   | 0   |
| 215 | 35.9  | 7.7  | 1 | 0   | 0   | 0   |
| 216 | 43.3  | 7.1  | 1 | 0   | 0   | 0   |
| 217 | 44.5  | 13.7 | 2 | 270 | 271 | 0   |
| 218 | 72.4  | 15.0 | 2 | 272 | 273 | 0   |
| 219 | 58.8  | 13.6 | 2 | 274 | 275 | 0   |
| 220 | 9.6   | 13.4 | 2 | 276 | 277 | 0   |
| 221 | 55.8  | 52.0 | 4 | 278 | 279 | 0   |
| 222 | 45.8  | 10.7 | 1 | 280 | 281 | 282 |
| 223 | 73.9  | 15.4 | 2 | 283 | 284 | 0   |

|     |       |      |   |     |     |     |
|-----|-------|------|---|-----|-----|-----|
| 224 | 12.2  | 14.4 | 2 | 285 | 286 | 0   |
| 225 | 56.4  | 21.5 | 3 | 287 | 288 | 0   |
| 226 | 271.2 | 5.7  | 0 | 0   | 0   | 0   |
| 227 | 46.0  | 6.7  | 1 | 0   | 0   | 0   |
| 228 | 94.9  | 15.4 | 2 | 289 | 290 | 291 |
| 229 | 70.3  | 15.4 | 2 | 292 | 293 | 0   |
| 230 | 149.6 | 7.0  | 0 | 0   | 0   | 0   |
| 231 | 51.5  | 10.7 | 1 | 294 | 295 | 0   |
| 232 | 263.0 | 6.8  | 0 | 0   | 0   | 0   |
| 233 | 55.6  | 10.7 | 1 | 296 | 297 | 0   |
| 234 | 121.1 | 10.1 | 1 | 0   | 0   | 0   |
| 235 | 23.9  | 15.4 | 2 | 298 | 299 | 300 |
| 236 | 48.5  | 10.7 | 1 | 301 | 302 | 0   |
| 237 | 89.1  | 10.7 | 1 | 303 | 304 | 0   |
| 238 | 180.5 | 4.6  | 0 | 0   | 0   | 0   |
| 239 | 23.7  | 7.3  | 1 | 0   | 0   | 0   |
| 240 | 317.8 | 7.5  | 0 | 0   | 0   | 0   |
| 241 | 128.1 | 10.4 | 1 | 0   | 0   | 0   |
| 242 | 210.2 | 6.1  | 0 | 0   | 0   | 0   |
| 243 | 8.1   | 10.7 | 1 | 305 | 306 | 0   |
| 244 | 159.8 | 5.8  | 0 | 0   | 0   | 0   |
| 245 | 31.3  | 10.7 | 1 | 307 | 308 | 0   |
| 246 | 145.7 | 5.7  | 0 | 0   | 0   | 0   |
| 247 | 33.2  | 10.7 | 1 | 0   | 0   | 0   |
| 248 | 176.1 | 6.2  | 0 | 0   | 0   | 0   |
| 249 | 46.3  | 10.7 | 1 | 309 | 310 | 0   |
| 250 | 181.9 | 4.6  | 0 | 0   | 0   | 0   |
| 251 | 51.9  | 8.4  | 1 | 0   | 0   | 0   |
| 252 | 235.7 | 5.7  | 0 | 0   | 0   | 0   |
| 253 | 106.5 | 10.7 | 1 | 0   | 0   | 0   |
| 254 | 302.4 | 5.9  | 0 | 0   | 0   | 0   |
| 255 | 64.9  | 10.7 | 1 | 311 | 312 | 0   |
| 256 | 183.2 | 7.6  | 0 | 0   | 0   | 0   |
| 257 | 34.1  | 10.7 | 1 | 313 | 314 | 0   |
| 258 | 335.3 | 7.7  | 0 | 0   | 0   | 0   |
| 259 | 45.2  | 9.9  | 1 | 0   | 0   | 0   |
| 260 | 308.9 | 5.8  | 0 | 0   | 0   | 0   |
| 261 | 98.5  | 10.7 | 1 | 0   | 0   | 0   |

|     |       |      |   |     |     |   |
|-----|-------|------|---|-----|-----|---|
| 262 | 185.6 | 6.8  | 0 | 0   | 0   | 0 |
| 263 | 13.8  | 10.7 | 1 | 315 | 316 | 0 |
| 264 | 310.4 | 5.7  | 0 | 0   | 0   | 0 |
| 265 | 39.4  | 10.7 | 1 | 317 | 318 | 0 |
| 266 | 267.5 | 5.1  | 0 | 0   | 0   | 0 |
| 267 | 154.6 | 10.1 | 1 | 0   | 0   | 0 |
| 268 | 40.9  | 10.7 | 1 | 319 | 320 | 0 |
| 269 | 211.7 | 6.1  | 0 | 0   | 0   | 0 |
| 270 | 183.3 | 9.1  | 0 | 0   | 0   | 0 |
| 271 | 95.7  | 9.4  | 1 | 0   | 0   | 0 |
| 272 | 35.0  | 10.7 | 1 | 321 | 322 | 0 |
| 273 | 78.8  | 8.0  | 1 | 0   | 0   | 0 |
| 274 | 31.1  | 6.4  | 1 | 0   | 0   | 0 |
| 275 | 19.1  | 6.4  | 1 | 0   | 0   | 0 |
| 276 | 288.8 | 6.2  | 0 | 0   | 0   | 0 |
| 277 | 71.6  | 10.7 | 1 | 323 | 324 | 0 |
| 278 | 126.2 | 15.4 | 2 | 325 | 326 | 0 |
| 279 | 104.2 | 22.7 | 3 | 327 | 328 | 0 |
| 280 | 115.7 | 10.7 | 1 | 329 | 330 | 0 |
| 281 | 305.3 | 5.8  | 0 | 0   | 0   | 0 |
| 282 | 98.2  | 10.7 | 1 | 331 | 332 | 0 |
| 283 | 34.3  | 7.5  | 1 | 0   | 0   | 0 |
| 284 | 145.6 | 5.1  | 0 | 0   | 0   | 0 |
| 285 | 61.3  | 10.7 | 1 | 333 | 334 | 0 |
| 286 | 96.6  | 10.7 | 1 | 335 | 336 | 0 |
| 287 | 72.2  | 15.4 | 2 | 337 | 338 | 0 |
| 288 | 38.7  | 12.8 | 2 | 339 | 340 | 0 |
| 289 | 56.1  | 10.7 | 1 | 341 | 342 | 0 |
| 290 | 58.1  | 8.3  | 1 | 0   | 0   | 0 |
| 291 | 123.7 | 9.9  | 1 | 0   | 0   | 0 |
| 292 | 473.9 | 5.4  | 0 | 0   | 0   | 0 |
| 293 | 112.3 | 10.7 | 1 | 343 | 344 | 0 |
| 294 | 303.2 | 6.7  | 0 | 0   | 0   | 0 |
| 295 | 83.3  | 10.7 | 1 | 345 | 346 | 0 |
| 296 | 190.8 | 4.5  | 0 | 0   | 0   | 0 |
| 297 | 46.4  | 10.7 | 1 | 347 | 348 | 0 |
| 298 | 96.8  | 9.8  | 1 | 0   | 0   | 0 |
| 299 | 478.9 | 6.6  | 0 | 0   | 0   | 0 |



|     |       |      |   |     |     |   |
|-----|-------|------|---|-----|-----|---|
| 300 | 15.1  | 10.7 | 1 | 349 | 350 | 0 |
| 301 | 172.5 | 6.0  | 0 | 0   | 0   | 0 |
| 302 | 25.9  | 6.4  | 1 | 0   | 0   | 0 |
| 303 | 313.3 | 4.8  | 0 | 0   | 0   | 0 |
| 304 | 16.0  | 6.4  | 1 | 0   | 0   | 0 |
| 305 | 315.7 | 6.5  | 0 | 0   | 0   | 0 |
| 306 | 47.1  | 8.4  | 1 | 0   | 0   | 0 |
| 307 | 290.6 | 6.5  | 0 | 0   | 0   | 0 |
| 308 | 108.5 | 10.6 | 1 | 0   | 0   | 0 |
| 309 | 460.7 | 4.9  | 0 | 0   | 0   | 0 |
| 310 | 74.5  | 10.7 | 1 | 0   | 0   | 0 |
| 311 | 141.5 | 5.7  | 0 | 0   | 0   | 0 |
| 312 | 142.0 | 10.7 | 1 | 351 | 352 | 0 |
| 313 | 325.1 | 7.1  | 0 | 0   | 0   | 0 |
| 314 | 97.5  | 10.7 | 1 | 353 | 354 | 0 |
| 315 | 265.9 | 4.3  | 0 | 0   | 0   | 0 |
| 316 | 57.3  | 8.4  | 1 | 0   | 0   | 0 |
| 317 | 207.9 | 5.4  | 0 | 0   | 0   | 0 |
| 318 | 13.0  | 6.4  | 1 | 0   | 0   | 0 |
| 319 | 369.5 | 6.2  | 0 | 0   | 0   | 0 |
| 320 | 8.9   | 10.7 | 1 | 355 | 356 | 0 |
| 321 | 219.9 | 7.9  | 0 | 0   | 0   | 0 |
| 322 | 26.9  | 10.5 | 1 | 357 | 358 | 0 |
| 323 | 189.9 | 7.0  | 0 | 0   | 0   | 0 |
| 324 | 106.8 | 8.7  | 1 | 0   | 0   | 0 |
| 325 | 45.1  | 6.9  | 1 | 0   | 0   | 0 |
| 326 | 17.2  | 14.4 | 2 | 359 | 360 | 0 |
| 327 | 68.6  | 10.7 | 1 | 361 | 362 | 0 |
| 328 | 13.9  | 15.4 | 2 | 363 | 364 | 0 |
| 329 | 232.7 | 6.8  | 0 | 0   | 0   | 0 |
| 330 | 65.2  | 10.4 | 1 | 0   | 0   | 0 |
| 331 | 131.9 | 3.6  | 0 | 0   | 0   | 0 |
| 332 | 46.8  | 10.7 | 1 | 365 | 366 | 0 |
| 333 | 61.7  | 8.3  | 1 | 0   | 0   | 0 |
| 334 | 126.4 | 10.7 | 1 | 367 | 368 | 0 |
| 335 | 250.1 | 7.4  | 0 | 0   | 0   | 0 |
| 336 | 126.1 | 10.7 | 1 | 369 | 370 | 0 |
| 337 | 196.2 | 6.3  | 0 | 0   | 0   | 0 |

|     |       |      |   |     |     |   |
|-----|-------|------|---|-----|-----|---|
| 338 | 103.2 | 14.0 | 2 | 371 | 372 | 0 |
| 339 | 13.9  | 5.4  | 1 | 0   | 0   | 0 |
| 340 | 97.8  | 9.2  | 1 | 0   | 0   | 0 |
| 341 | 290.4 | 5.3  | 0 | 0   | 0   | 0 |
| 342 | 46.9  | 10.7 | 1 | 373 | 374 | 0 |
| 343 | 169.7 | 6.3  | 0 | 0   | 0   | 0 |
| 344 | 109.7 | 10.4 | 1 | 0   | 0   | 0 |
| 345 | 389.8 | 6.9  | 0 | 0   | 0   | 0 |
| 346 | 31.7  | 10.7 | 1 | 0   | 0   | 0 |
| 347 | 205.8 | 6.0  | 0 | 0   | 0   | 0 |
| 348 | 65.9  | 10.7 | 1 | 375 | 376 | 0 |
| 349 | 296.4 | 7.4  | 0 | 0   | 0   | 0 |
| 350 | 26.0  | 6.5  | 1 | 0   | 0   | 0 |
| 351 | 271.5 | 7.2  | 0 | 0   | 0   | 0 |
| 352 | 16.5  | 10.7 | 1 | 0   | 0   | 0 |
| 353 | 331.4 | 7.5  | 0 | 0   | 0   | 0 |
| 354 | 8.3   | 10.7 | 1 | 0   | 0   | 0 |
| 355 | 320.4 | 4.6  | 0 | 0   | 0   | 0 |
| 356 | 139.3 | 10.3 | 1 | 0   | 0   | 0 |
| 357 | 217.3 | 5.5  | 0 | 0   | 0   | 0 |
| 358 | 9.4   | 5.4  | 1 | 0   | 0   | 0 |
| 359 | 74.8  | 7.9  | 1 | 0   | 0   | 0 |
| 360 | 66.4  | 10.7 | 1 | 377 | 378 | 0 |
| 361 | 260.9 | 7.6  | 0 | 0   | 0   | 0 |
| 362 | 118.2 | 10.7 | 1 | 379 | 380 | 0 |
| 363 | 217.7 | 6.4  | 0 | 0   | 0   | 0 |
| 364 | 66.8  | 13.4 | 2 | 381 | 382 | 0 |
| 365 | 275.1 | 7.9  | 0 | 0   | 0   | 0 |
| 366 | 25.8  | 10.0 | 1 | 0   | 0   | 0 |
| 367 | 166.9 | 4.6  | 0 | 0   | 0   | 0 |
| 368 | 34.3  | 10.7 | 1 | 383 | 384 | 0 |
| 369 | 242.4 | 5.5  | 0 | 0   | 0   | 0 |
| 370 | 34.7  | 10.7 | 1 | 385 | 386 | 0 |
| 371 | 48.3  | 8.1  | 1 | 0   | 0   | 0 |
| 372 | 92.5  | 10.5 | 1 | 0   | 0   | 0 |
| 373 | 112.2 | 5.0  | 0 | 0   | 0   | 0 |
| 374 | 4.0   | 5.4  | 1 | 0   | 0   | 0 |
| 375 | 169.6 | 4.0  | 0 | 0   | 0   | 0 |

|     |       |      |   |     |     |   |
|-----|-------|------|---|-----|-----|---|
| 376 | 60.7  | 9.9  | 1 | 0   | 0   | 0 |
| 377 | 359.7 | 6.3  | 0 | 0   | 0   | 0 |
| 378 | 60.8  | 10.7 | 1 | 387 | 388 | 0 |
| 379 | 163.8 | 5.9  | 0 | 0   | 0   | 0 |
| 380 | 78.7  | 10.7 | 1 | 389 | 390 | 0 |
| 381 | 258.4 | 7.9  | 0 | 0   | 0   | 0 |
| 382 | 17.3  | 10.7 | 1 | 391 | 392 | 0 |
| 383 | 219.0 | 7.2  | 0 | 0   | 0   | 0 |
| 384 | 57.3  | 10.7 | 1 | 0   | 0   | 0 |
| 385 | 356.5 | 4.9  | 0 | 0   | 0   | 0 |
| 386 | 78.5  | 10.7 | 1 | 393 | 394 | 0 |
| 387 | 243.6 | 5.5  | 0 | 0   | 0   | 0 |
| 388 | 61.2  | 10.7 | 1 | 395 | 396 | 0 |
| 389 | 185.2 | 7.3  | 0 | 0   | 0   | 0 |
| 390 | 27.9  | 10.7 | 1 | 0   | 0   | 0 |
| 391 | 241.6 | 6.2  | 0 | 0   | 0   | 0 |
| 392 | 12.9  | 10.7 | 1 | 397 | 398 | 0 |
| 393 | 349.9 | 7.1  | 0 | 0   | 0   | 0 |
| 394 | 18.6  | 10.7 | 1 | 0   | 0   | 0 |
| 395 | 293.3 | 6.0  | 0 | 0   | 0   | 0 |
| 396 | 60.0  | 10.7 | 1 | 0   | 0   | 0 |
| 397 | 122.8 | 7.1  | 0 | 0   | 0   | 0 |
| 398 | 27.4  | 10.7 | 1 | 399 | 400 | 0 |
| 399 | 231.6 | 6.1  | 0 | 0   | 0   | 0 |
| 400 | 125.0 | 8.9  | 1 | 0   | 0   | 0 |

The last three columns represent vessel's daughters whose number is the vessel number given by the first column. A zero value represents that there is no daughter vessel. This vessel connectivity is used to generate the conductivity matrix for flow solution.
